# Supplementary material for: An integrative approach for the identification of prognostic and predictive biomarkers in rectal cancer
Source: PubMed Central journal article supplement (PMC4741712; doi:10.18632/oncotarget.4935), 2015-09-02
Supplement: oncotarget-06-32561-s001.pdf [file oncotarget-06-32561-s001.pdf]

## SUPPLEMENTARY FIGURES AND TABLES

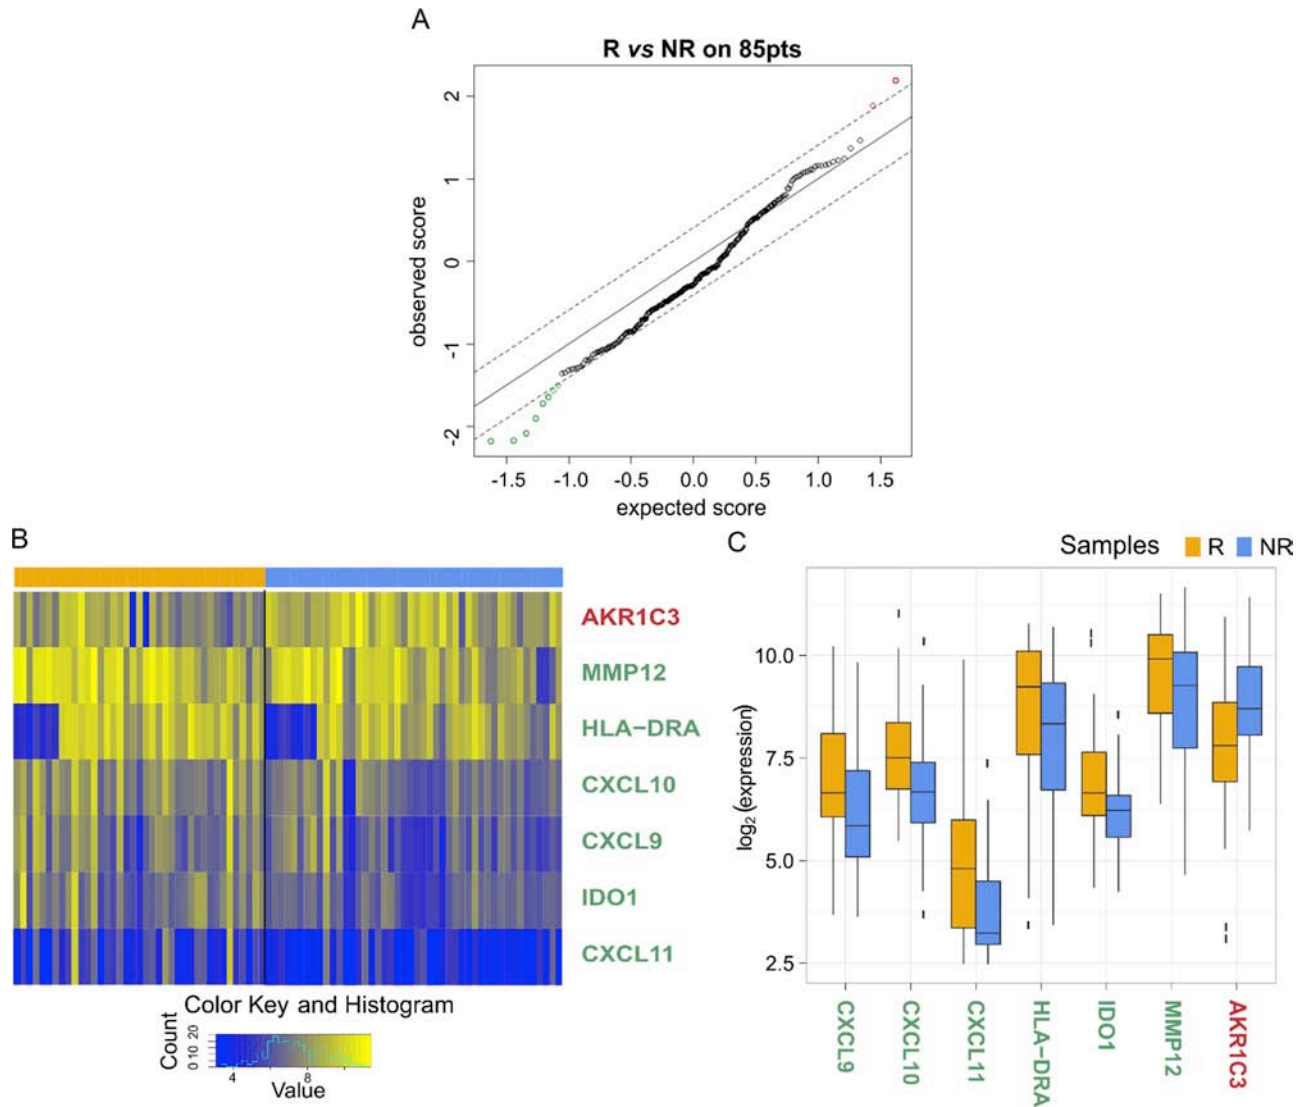

**Supplementary Figure S1: Seven genes differentially expressed between responders and non-responders identified by SAM analysis.** CXCL9, CXCL10, CXCL11, HLA-DRA, IDO1 and MMP12 were up-regulated while AKR1C3 was down-regulated in the responders group, and vice versa: **A.** SAM plot with significantly up-regulated genes labeled in red, down-regulated genes in green. Only genes beyond the 95% confidence interval have been considered; **B.** Heatmap of Differentially Expressed Genes (DEG) expression profiles in considered samples; **C.** Boxplot showing expression variation of DEGs in considered groups.

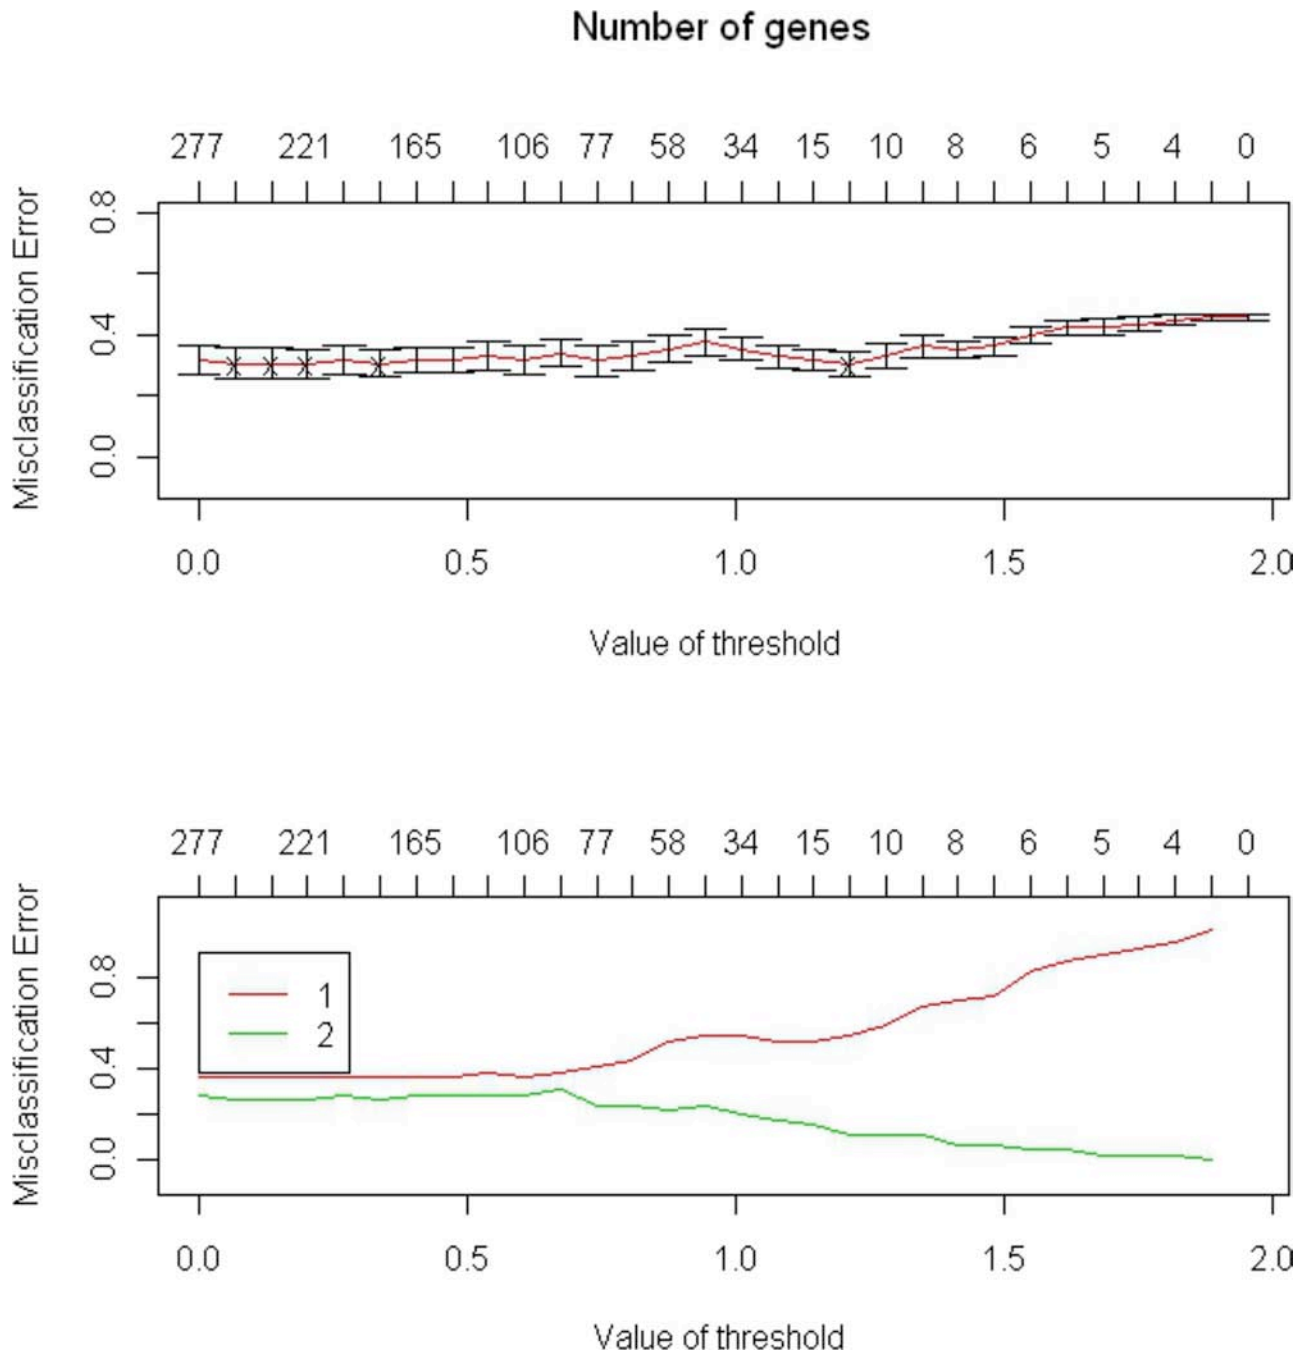

**Supplementary Figure S2: PAM results: misclassification error rates between responders and non-responders using the set of 277 filtered genes.**

IDO1 Expression in TCGA Colorectal Statistics, grouped by Residual tumor

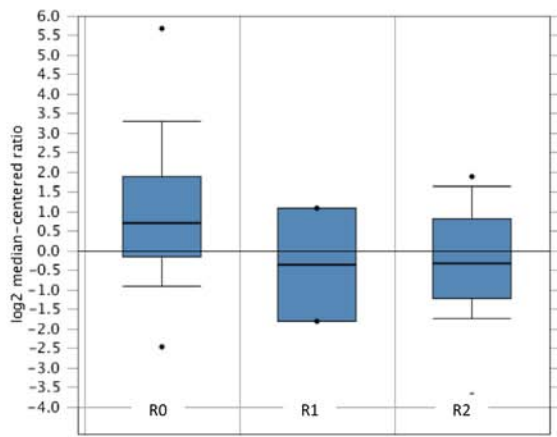

AKR1C3 Expression in TCGA Colorectal Statistics, grouped by Residual tumor

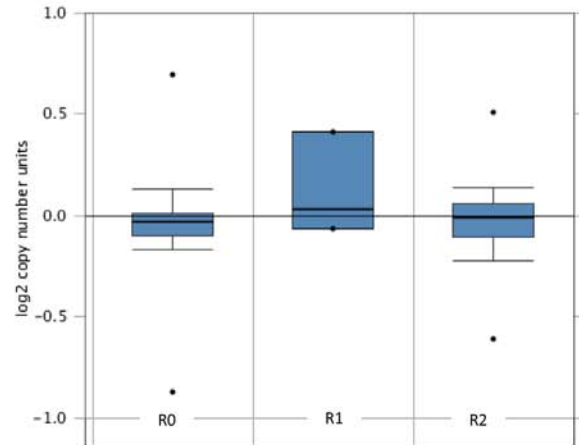

**Supplementary Figure S3: TCGA data set analysis.** IDO 1 and AKR1C3 expression level vs Residual tumor grade [R0=no residual tumor; R1=microscopic residual tumor; R2=macroscopic residual tumor;]. R0 were considered complete/good response while R1 and R2 bad/absent response.



**Supplementary Table S1: Differentially expressed genes between responders and non-responders groups identified by the three different studies**

| <i>Kim et al.</i>         |                            |                                 | <i>Agostini et al.</i>       |                    | <i>Rimkus et al.</i>        |                           |
|---------------------------|----------------------------|---------------------------------|------------------------------|--------------------|-----------------------------|---------------------------|
| AP2B1<br>Gene ID: 163     | FLJ14054<br>Gene ID: 4883  | LOC339692<br>Gene ID:<br>440895 | RPS4Y1<br>Gene ID:<br>6192   | XRCC3ID:<br>7517   | ADPRHL2<br>Gene ID: 54936   | PEX14<br>Gene ID: 5195    |
| ARHGEF7<br>Gene ID: 8874  | FLJ20674<br>Gene ID: 54621 | LOC90379<br>Gene ID:<br>90379   | SAE1<br>Gene ID:<br>10055    | ZNF160ID:<br>90338 | BLVRA<br>Gene ID: 644       | SDHC<br>Gene ID: 6391     |
| ASL<br>Gene ID: 435       | FLNA<br>Gene ID: 2316      | LOC92482<br>Gene ID:<br>92482   | SEMA3C<br>Gene ID:<br>10512  | HFM1ID:<br>164045  | C10orf4<br>Gene ID: 118924  | SF3A1<br>Gene ID: 10291   |
| BICD2<br>Gene ID: 23299   | FOXO3A<br>Gene ID: 2309    | MAX<br>Gene ID: 4149            | SLC24A3<br>Gene ID:<br>57419 | ASXL2ID:<br>55252  | C14orf48<br>Gene ID: 256369 | SLC35E1<br>Gene ID: 79939 |
| BMP4<br>Gene ID: 652      | FRMD4A<br>Gene ID: 55691   | MCF2L<br>Gene ID:<br>23263      | SOX4<br>Gene ID:<br>6659     |                    | C9orf57<br>Gene ID: 138240  | SP2<br>Gene ID: 6668      |
| BTAF1<br>Gene ID: 9044    | GLDC<br>Gene ID: 2731      | MLF2<br>Gene ID: 8079           | SULT1A2<br>Gene ID:<br>6799  |                    | CASP1<br>Gene ID: 834       | STAT2<br>Gene ID: 6773    |
| RPAP2<br>Gene ID: 79871   | GPR107<br>Gene ID: 57720   | MMP14<br>Gene ID: 4323          | TAF6<br>Gene ID:<br>6878     |                    | CCNK<br>Gene ID: 8812       | TDE1 Gene ID:<br>10955    |
| MIS18A<br>Gene ID: 54069  | H2AFX<br>Gene ID: 3014     | MSX2<br>Gene ID: 4488           | TBC1D13<br>Gene ID:<br>54662 |                    | COX15<br>Gene ID: 1355      | TIAL1<br>Gene ID: 7073    |
| CENPM<br>Gene ID: 79019   | HEMK1<br>Gene ID: 51409    | NF1<br>Gene ID: 4763            | TBL2<br>Gene ID:<br>26608    |                    | ETS2 Gene ID:<br>2114       | TNFRSF1B Gene<br>ID: 7133 |
| FAM134A<br>Gene ID: 79137 | ZFP276<br>Gene ID: 92822   | NUP62<br>Gene ID:<br>23636      | TFR2<br>Gene ID:<br>7036     |                    | FREM1 Gene<br>ID: 158326    | TOE1<br>Gene ID: 114034   |
| C7orf25<br>Gene ID: 79020 | HNRNPC<br>Gene ID: 3183    | P2RY13<br>Gene ID:<br>53829     | TGOLN2<br>Gene ID:<br>10618  |                    | GGA2<br>Gene ID: 23062      | TUBD1<br>Gene ID: 51174   |
| CDC20<br>Gene ID: 991     | HNRPR<br>Gene ID: 10236    | PCSK5<br>Gene ID: 5125          | TPM4<br>Gene ID:<br>7171     |                    | GRCC10 Gene<br>ID: 113246   | ZNF652<br>Gene ID: 22834  |
| CPS1<br>Gene ID: 1373     | HSD3B2<br>Gene ID: 3284    | PDCD4<br>Gene ID:<br>27250      | TRAF4<br>Gene ID:<br>9618    |                    | H41 Gene ID:<br>55573       | USP42<br>Gene ID: 84132   |
| DDX1<br>Gene ID: 1653     | HSPC047<br>Gene ID: 29060  | PDXK<br>Gene ID: 8566           | TUBB<br>Gene ID:<br>203068   |                    | KCNJ2<br>Gene ID: 3759      | USP48<br>Gene ID: 84196   |

(Continued)

| <i>Kim et al.</i>       |                                 |                              | <i>Agostini et al.</i>     |  | <i>Rimkus et al.</i>         |                          |
|-------------------------|---------------------------------|------------------------------|----------------------------|--|------------------------------|--------------------------|
| EIF4A1<br>Gene ID: 1973 | HSPC152<br>Gene ID: 51504       | PHF7<br>Gene ID:<br>51533    | TYMS<br>Gene ID:<br>7298   |  | KPNA6<br>Gene ID: 23633      | VPS37C<br>Gene ID: 55048 |
| ELAVL1<br>Gene ID: 1994 | HTR2C<br>Gene ID: 3358          | PIP3-EGene<br>ID: 26034      | UBR2<br>Gene ID:<br>23304  |  | KPNB1<br>Gene ID: 3837       | WTAP<br>Gene ID: 9589    |
| ENO1<br>Gene ID: 2023   | IGLC2<br>Gene ID: 3538          | PLCE1<br>Gene ID:<br>51196   | ULK4<br>Gene ID:<br>54986  |  | LOC199899<br>Gene ID: 199899 | YY1AP1<br>Gene ID: 55249 |
| ZNF84<br>Gene ID: 7637  | ILF3<br>Gene ID: 3609           | PYCARD<br>Gene ID:<br>29108  | USP14<br>Gene ID:<br>9097  |  | MAFB<br>Gene ID: 9935        | ZNF24<br>Gene ID: 7572   |
| EPS15<br>Gene ID: 2060  | ITM2A<br>Gene ID: 9452          | RAD23B<br>Gene ID: 5887      | YIPF2<br>Gene ID:<br>78992 |  | MFN1<br>Gene ID: 55669       |                          |
| EZH1<br>Gene ID: 2145   | KCNH2<br>Gene ID: 3757          | RAP1A<br>Gene ID: 5906       |                            |  | MGC14288<br>Gene ID: 84987   |                          |
| FBS1<br>Gene ID: 26232  | LEMD3<br>Gene ID: 23592         | RAPGEF2<br>Gene ID: 9693     |                            |  | M-RIP<br>Gene ID: 23164      |                          |
| FGFR4 Gene ID:<br>2264  | LMNB2<br>Gene ID: 84823         | RPL10L<br>Gene ID:<br>140801 |                            |  | NARF<br>Gene ID: 26502       |                          |
| FHL1 Gene ID:<br>2273   | LOC283768<br>Gene ID:<br>283768 | RPS2Gene ID:<br>6187         |                            |  | PAPD1<br>Gene ID: 55149      |                          |

**Supplementary Table S2: Single matrix of 277 differently expressed genes obtained through *de-novo* integration of gene expression data**

| ProbeID |                |                |                |                |
|---------|----------------|----------------|----------------|----------------|
|         | GC01M020174_at | GC04M149219_at | GC0XP102437_at | GC17M015073_at |
|         | GC01M047421_at | GC04M157902_at | GC0XP115481_at | GC17M023108_at |
|         | GC01M103055_at | GC04M169375_at | GC0YM020326_at | GC17M036285_at |
|         | GC01M107915_at | GC04P074845_at | GC0YP002769_at | GC17M036332_at |
|         | GC01M109988_at | GC04P075470_at | GC0YP013454_at | GC17M037029_at |
|         | GC01M120003_at | GC04P078623_at | GC0YP020142_at | GC17M044158_at |
|         | GC01M149603_at | GC04P089115_at | GC0YP021075_at | GC17P001612_at |
|         | GC01M151629_at | GC04P156807_at | GC10M069226_at | GC17P007151_at |
|         | GC01M153424_at | GC04P157044_at | GC10M069713_at | GC17P029636_at |
|         | GC01M184907_at | GC04P166519_at | GC10M095341_at | GC17P055582_at |
|         | GC01M201414_at | GC05M000848_at | GC10M133631_at | GC18P027281_at |
|         | GC01M205168_at | GC05M016527_at | GC10P005126_at | GC18P059297_at |
|         | GC01M224140_at | GC05M042835_at | GC10P029006_at | GC19M006628_at |
|         | GC01M233846_at | GC05M095751_at | GC10P070518_at | GC19M017374_at |
|         | GC01P000938_at | GC05M134934_at | GC10P085944_at | GC19M041087_at |
|         | GC01P022852_at | GC05M138752_at | GC10P088718_at | GC19M045045_at |
|         | GC01P078858_at | GC05M147184_at | GC10P091142_at | GC19M046869_at |
|         | GC01P078888_at | GC05M151021_at | GC10P124310_at | GC19M056153_at |
|         | GC01P086646_at | GC05P080564_at | GC11M002113_at | GC19P018358_at |
|         | GC01P086724_at | GC05P082804_at | GC11M005203_at | GC19P050663_at |
|         | GC01P100897_at | GC05P096238_at | GC11M046834_at | GC20M023723_at |
|         | GC01P191044_at | GC05P137829_at | GC11M059376_at | GC20M043960_at |
|         | GC01P204484_at | GC05P147423_at | GC11M101896_at | GC20M049646_at |
|         | GC01P205137_at | GC05P149320_at | GC11M102146_at | GC20P009024_at |
|         | GC01P205561_at | GC06M109414_at | GC11M102165_at | GC20P025329_at |
|         | GC01P210805_at | GC06M116546_at | GC11M102211_at | GC20P029656_at |
|         | GC02M079165_at | GC06M133044_at | GC11M102238_at | GC20P034603_at |
|         | GC02M079296_at | GC06M169433_at | GC11M110728_at | GC20P043236_at |
|         | GC02M088261_at | GC06P032434_at | GC11M113947_at | GC20P043532_at |
|         | GC02M162707_at | GC06P046869_at | GC11P001064_at | GC20P044771_at |
|         | GC02M183406_at | GC06P057145_at | GC11P001200_at | GC20P055569_at |
|         | GC02M189604_at | GC07M016467_at | GC11P005667_at | GC20P060918_at |
|         | GC02M199842_at | GC07M023316_at | GC11P057121_at | GC21M042605_at |
|         | GC02M227935_at | GC07M027147_at | GC11P060016_at | GC21M042655_at |
|         | GC02M237897_at | GC07M027168_at | GC11P063060_at | GC21P041720_at |

(Continued)

| ProbeID |                |                |                |                |
|---------|----------------|----------------|----------------|----------------|
|         | GC02P017643_at | GC07M037912_at | GC11P068208_at | GC21P046342_at |
|         | GC02P037483_at | GC07M045918_at | GC11P069604_at | GC22M022706_at |
|         | GC02P044414_at | GC07M086970_at | GC11P116575_at | GC22P020714_at |
|         | GC02P074031_at | GC07M099402_at | GC12M007963_at | GC0XP099705_at |
|         | GC02P079201_at | GC07M100662_at | GC12M014926_at | GC16P088214_at |
|         | GC02P089024_at | GC07M107193_at | GC12M045755_at | GC04M075202_at |
|         | GC02P101974_at | GC07P022732_at | GC12M051126_at | GC04M077112_at |
|         | GC02P108272_at | GC07P023252_at | GC12M089999_at | GC04M077132_at |
|         | GC02P151922_at | GC07P093861_at | GC12M090041_at | GC04M077145_at |
|         | GC02P169629_at | GC07P100302_at | GC12M115961_at | GC04M084305_at |
|         | GC02P189547_at | GC07P133862_at | GC12P007038_at | GC04M088696_at |
|         | GC02P217206_at | GC08M006769_at | GC12P012778_at | GC04M100457_at |
|         | GC02P228386_at | GC08M006900_at | GC12P015366_at | GC0XM003220_at |
|         | GC02P238060_at | GC08M027724_at | GC12P020859_at | GC0XM008456_at |
|         | GC03M016333_at | GC08M042151_at | GC12P068028_at | GC0XM015489_at |
|         | GC03M050312_at | GC08M095330_at | GC12P070121_at | GC0XM072957_at |
|         | GC03M058153_at | GC08M120638_at | GC13M076352_at | GC0XM150873_at |
|         | GC03M121595_at | GC08P024297_at | GC13P052500_at | GC0XP043400_at |
|         | GC03M140718_at | GC08P039891_at | GC13P099539_at | GC0XP051503_at |
|         | GC03M151165_at | GC08P070541_at | GC14M024170_at | GC16M055258_at |
|         | GC03M159897_at | GC08P086563_at | GC14M024348_at | GC16M063538_at |
|         | GC03M166179_at | GC08P098950_at | GC14M050441_at | GC16P000751_at |
|         | GC03M196963_at | GC08P142501_at | GC14M093914_at | GC16P011966_at |
|         | GC03M198162_at | GC09M036204_at | GC14M103055_at | GC16P054070_at |
|         | GC03P062279_at | GC09M074705_at | GC14M104476_at | GC16P055216_at |
|         | GC03P123526_at | GC09M094258_at | GC14M105876_at | GC16P065525_at |
|         | GC03P150065_at | GC09M116822_at | GC14P030413_at | GC04M069085_at |
|         | GC03P161881_at | GC09P006206_at | GC14P074815_at | GC04M071761_at |
|         | GC03P185762_at | GC09P033230_at | GC15M043172_at | GC04M075086_at |
|         | GC04M015578_at | GC09P035663_at | GC15P030797_at | GC04M075092_at |
|         | GC04M056156_at | GC09P074956_at | GC15P043331_at | GC04M075100_at |
|         | GC04M057210_at | GC09P100746_at | GC15P057691_at | GC09P129951_at |
|         | GC09P134927_at | GC15P072253_at | GC16M045672_at |                |
|         | GC09P134947_at | GC15P078858_at | GC0XM002846_at |                |
|         | GC16M014673_at | GC16M028457_at | GC09P136673_at |                |



**Supplementary Table S3: Significantly enriched pathways and *p*-values for: (a) figure 2 and (b) figure 4**

| <b>a) Pathway</b>     | <b><i>p</i>-value</b> |
|-----------------------|-----------------------|
| Immune System         | 3,64E-07              |
| Signal Transduction   | 0,024148              |
| Hemostasis            | 0,181925              |
| Metabolism            | 0,21381               |
| Apoptosis             | 0,220759              |
| Developmental Biology | 0,370575              |

| <b>b) Pathway</b>                                       | <b><i>p</i>-value</b> |
|---------------------------------------------------------|-----------------------|
| Immune System                                           | 3,14E-16              |
| RNF125 mediated ubiquitination of RIG-I, MDA5 and IPS-1 | 6,41E-07              |
| Hemostasis                                              | 9,07E-06              |
| Signal Transduction                                     | 0,002719              |
| Metabolism                                              | 0,002898              |
| APC-Cdc20 mediated degradation of Nek2A                 | 0,008458              |
| Cell-Cell communication                                 | 0,013402              |
| Gene Expression                                         | 0,023573              |
| Apoptosis                                               | 0,053735              |
| Cdc20:Phospho-APC/C mediated degradation of Cyclin A    | 0,059329              |
| Disease                                                 | 0,070436              |
| Developmental Biology                                   | 0,143688              |
| Cell Cycle                                              | 0,148407              |
| Neuronal System                                         | 0,166389              |
| Muscle contraction                                      | 0,235869              |
| Metabolism of RNA                                       | 0,338982              |
| DNA Repair                                              | 0,345511              |
| DNA Replication                                         | 0,353839              |

**Supplementary Table S4: Raw data obtained from “The Comparative Toxicogenomics Database” (CTD) for figure 3A.** Data for figure 3B is extracted from the network used to produce figure 3A.
